# Supplementary material for: How Effective Is Environmental Protection for Ensuring the Vitality of Wild Orchid Species? A Case Study of a Protected Area in Italy
Source: MDPI journal article supplement (doi:10.3390/plants13050610), 2024-02-23
Supplement: s1 [file s1]

Supplementary Table S1 – Brief summary of top-soil chemistry at the sampling sites.

| Species               | Protection | pH   | Conductivity | Salinity | N-NH <sub>4</sub> | N-NO <sub>3</sub> | P-PO <sub>4</sub> |
|-----------------------|------------|------|--------------|----------|-------------------|-------------------|-------------------|
| <i>O. sphegodes</i>   | P          | 6.23 | 348.40       | 0.1      | 2.99              | 16.46             | 4.55              |
|                       | NP         | 6.19 | 267.10       | 0.05     | 0.64              | 46.73             | 11.85             |
| <i>A. morio</i>       | P          | 6.42 | 458.70       | 0.16     | 3.52              | 19.86             | 4.81              |
|                       | NP         | 6.22 | 201.20       | 0.02     | 0.96              | 28.77             | 5.27              |
| <i>A. pyramidalis</i> | P          | 5.91 | 164.57       | 0.00     | 2.11              | 10.79             | 4.12              |
|                       | NP         | 6.23 | 197.40       | 0.00     | 0.38              | 12.47             | 3.68              |
| <i>A. coriophora</i>  | P          | 6.20 | 370.57       | 0.11     | 3.27              | 17.06             | 4.81              |
|                       | NP         | 6.26 | 160.84       | 0.00     | 2.91              | 7.12              | 3.65              |

Supplementary Table S2 - ANOVAs of the risk categories (1: absent; 2: weak; 3: moderate; 4: high). The asterisks indicate significant ( $p < 0.05$ ) differences between protected (P) and non-protected (NP) sites.

| Species               | Protection | Mowing    | Waste     | Herbivory  | IAS        |
|-----------------------|------------|-----------|-----------|------------|------------|
| <i>O. sphegodes</i>   | P          | 3.00±0.58 | 2.00±0.58 | 1.67±0.67  | 2.33±0.67  |
|                       | NP         | 3.00±0.58 | 1.33±0.33 | 2.00±0.58  | 3.33±0.58  |
| <i>A. morio</i>       | P          | 1.67±0.67 | 1.67±0.67 | 1.67±0.67  | 2.33±0.67  |
|                       | NP         | 2.33±0.89 | 2.67±0.89 | 2.67±0.67  | 3.33±0.67  |
| <i>A. pyramidalis</i> | P          | 2.00±1.00 | 1.67±0.67 | 1.33±0.33  | 1.67±0.33  |
|                       | NP         | 1.67±0.67 | 2.33±0.67 | 1.33±0.33  | 2.33±0.66  |
| <i>A. coriophora</i>  | P          | 2.67±0.89 | 2.67±0.89 | 1.00±0.00  | 2.00±0.58  |
|                       | NP         | 2.75±0.75 | 2.75±0.48 | 2.00±0.70* | 4.00±0.00* |

Supplementary Figure S1 – Pictures of orchid populations at protected (left) and non-protected (right) sites.

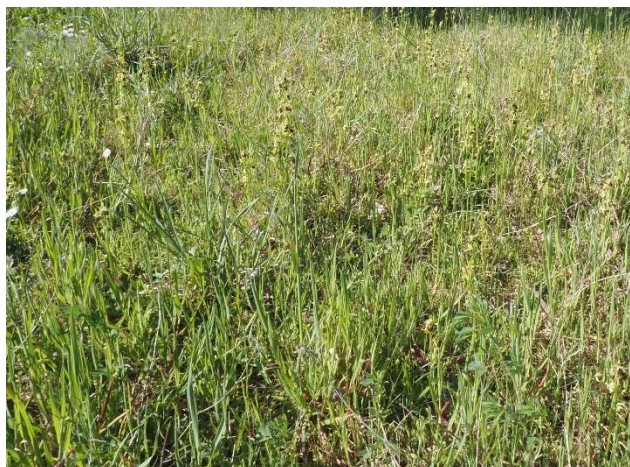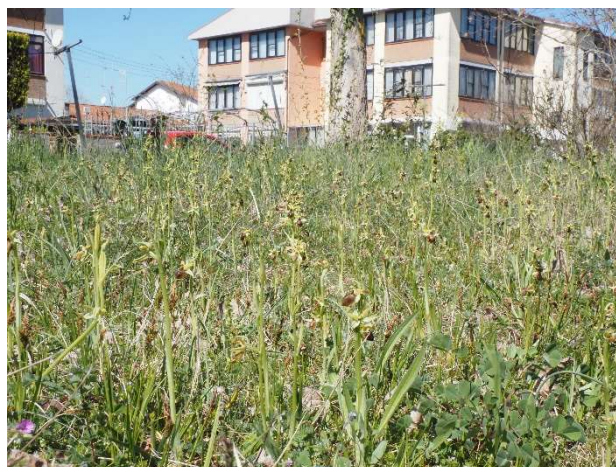

*Ophrys sphegodes*

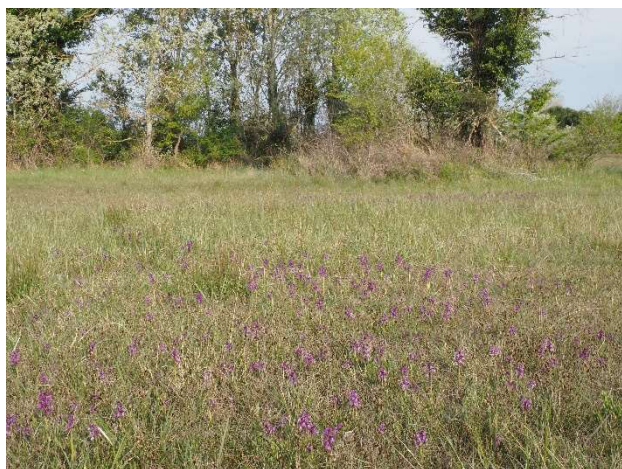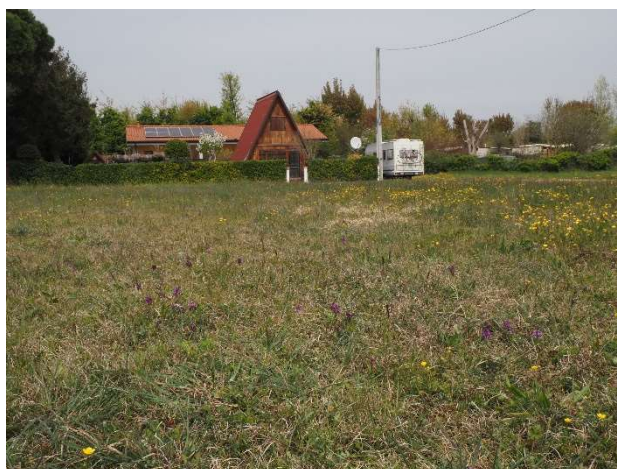

*Anacamptis morio*



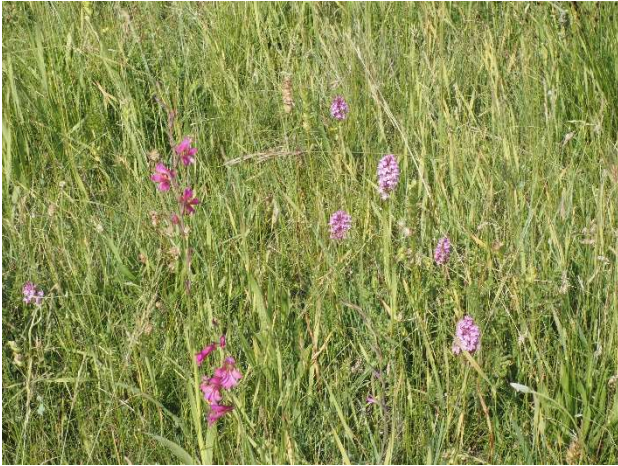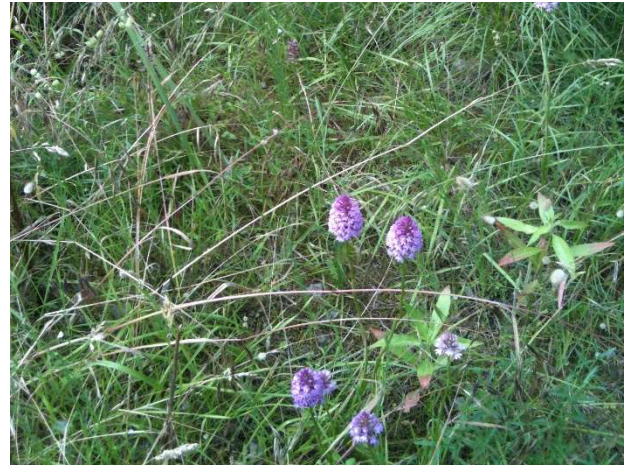

*Anacamptis pyramidalis*

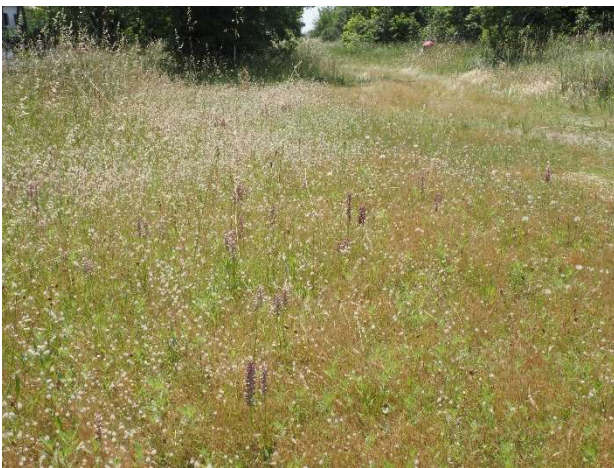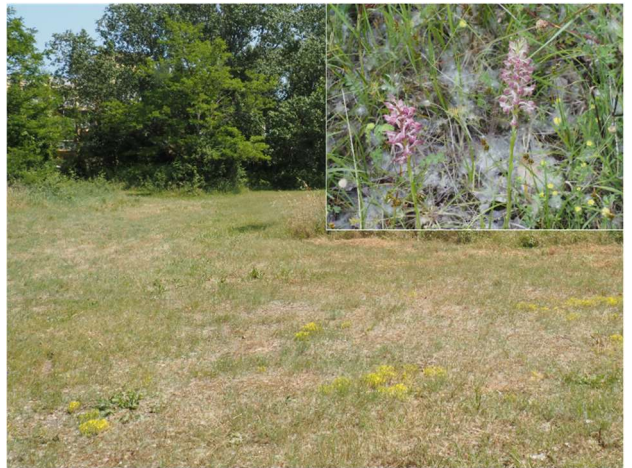

*Anacamptis coriophora*
